# Supplementary material
Source: Springer Nature journal article supplement (https://www.springermedizin.de/resource/supplementary/12906_2012_1184_MOESM2_ESM.pdf/9520102)

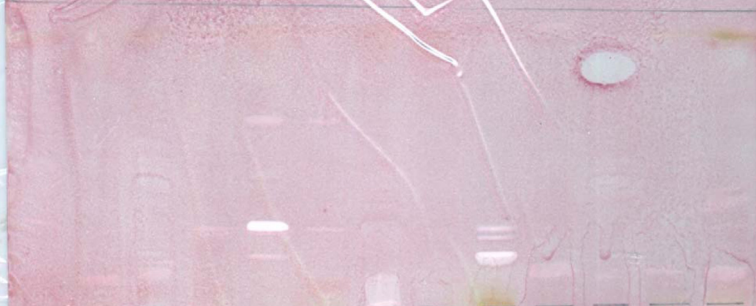

BD

ZC

CG

HT

AD

SM

ML

IF

LS

MA

CA

CD

MG

Supplement: MOESM2 [file 9520102]
